# Supplementary material
Source: PubMed Central journal article supplement (PMC3585062)
Supplement: supp_M112.440024_jbc.M112.440024-1.pdf [file supp_M112.440024_jbc.M112.440024-1.pdf]

**SUPPLEMENTAL DATA**

Table S1. Cytochrome *c* maturation (Ccm) components and their role

| <b>Ccm protein</b> | <b>Structural Features</b>                                                                                                                        | <b>Proposed Funtion</b>                                                                                                                                                     |
|--------------------|---------------------------------------------------------------------------------------------------------------------------------------------------|-----------------------------------------------------------------------------------------------------------------------------------------------------------------------------|
| CcmA               | Peripheral membrane protein with ATP-binding domain (Walker A and B motifs)                                                                       | Part of the CcmABCD complex, a predicted ABC-type transporter; required for the ATP-dependent release of holoCcmE from the CcmABCDE complex.                                |
| CcmB               | Six TM helices and a conserved FXXDXXDGSL motif                                                                                                   | Part of the CcmABCD complex, a predicted ABC-type transporter; required for the release of holoCcmE from the CcmABCDE complex                                               |
| CcmC               | Six TM helices with a tryptophan-rich (WGX[F,Y,W]WXWDXRLT) motif, and two conserved His residues                                                  | Part of the CcmABCD complex, a predicted ABC-type transporter; transfers heme to apoCcmE, providing axial ligands to the heme iron; acts as a CcmE-specific heme lyase.     |
| CcmD               | Small single TM helix protein with no conserved domains                                                                                           | Part of the CcmABCD complex, a predicted ABC-type transporter; required for the release of holoCcmE from the CcmABCDE complex                                               |
| CcmE               | Single TM helix with a periplasmic domain containing a conserved HXXXY motif                                                                      | Heme chaperone binding covalently vinyl-2 of heme via the conserved His residue; delivers heme to the apocytochrome <i>c</i> substrates                                     |
| CcmF               | Eleven TM helices with a tryptophan-rich (WGGXWFWDPVEN) motif, and four conserved His residues (two of them are ligands of a <i>b</i> -type heme) | Part of the CcmFHI heme ligation complex; interacts with apocytochromes <i>c</i> and CcmE, and suggested to reduce heme in holoCcmE for its transfer to the apocytochrome   |
| CcmG               | Single TM helix with a periplasmic domain containing a thioredoxin motif (CXXC)                                                                   | Binds poorly apocytochromes <i>c</i> , and suggested to reduce the disulfide at the heme binding site of apocytochrome <i>c</i> either directly or via CcmH                 |
| CcmH               | Single TM helix with a periplasmic domain containing a thioredoxin-like motif (LRCXXC)                                                            | Part of the CcmFHI heme ligation complex; interacts with apocytochrome <i>c</i> and suggested to reduce its disulfide bond for the stereo-specific heme ligation            |
| CcmI               | Two TM helices, linked by a cytoplasmic loop with a leucine-zipper-like motif, and a large periplasmic domain containing three TPR repeats        | Part of the CcmFHI heme ligation complex; is an apocytochrome <i>c</i> chaperone binding to the C-terminal portion of the apocytochrome <i>c</i> via its periplasmic domain |
| CcdA               | Six TM helices with two conserved redox active Cys residues                                                                                       | Thiol-reduction of CcmG                                                                                                                                                     |

Table S2. Nucleotide sequences of the oligonucleotide primers used in this study.

| Designation                    | Constructs | Nucleotide sequence (5' to 3')                                                                                                            |
|--------------------------------|------------|-------------------------------------------------------------------------------------------------------------------------------------------|
| CcmE-NdeI-Fwd<br>CcmE-BamHI-Rv | pAV4       | CGG CAT ATG AGA AAC CTG AAG AAA ACG CGG<br>ATT GGA TCC TTA TGC CGC TCA GCC CTC GGG CT                                                     |
| CcmEH123A-Fwd<br>CcmEH123A-Rv  | pAV4H123A  | CGA AAT CCT GGC CAA GGC TGA CGA AAA CTA CAT G<br>CAT GTA GTT TTC GTC AGC CTT GGC CAG GAT TTC G                                            |
| FLAG-Fw<br>FLAG-Rv             | pFLAG-CcmI | TAC CAT GGG CGA CTA CAA GGA CGA CGA CGA CAA GAG CAG CGG CCA TAT CG<br>GGC CGC TGC TCT TGT CGT CGT CGT CCT TGT AGT CGC CCA TGG TAT ATC TCC |

**Figure S1. Verissimo *et al.*,**

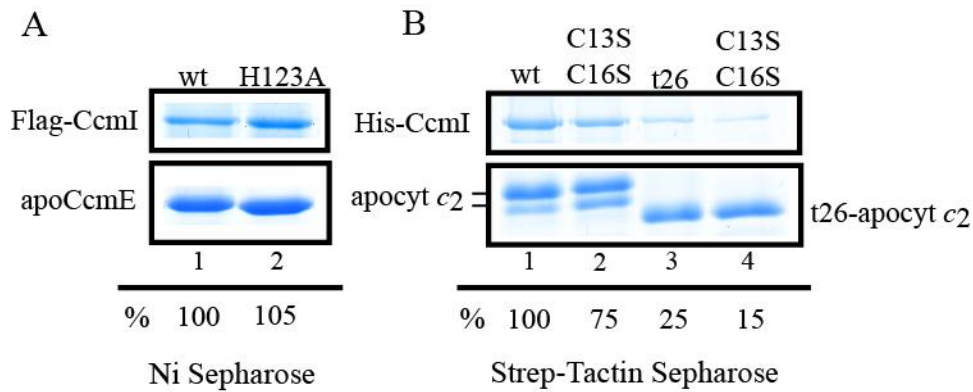

**Figure S1. A)** Co-purification of Flag-CcmI with His-apoCcmE (lane 1) and its His-apoCcmE-H123A mutant (lane 2) using Ni Sepharose resin. **B)** Co-purification of FlagCcmI with Strep-apocytochrome  $c_2$  (lane 1), its C13SC16S mutant (lane 2), the t26-truncated Strep-apocytochrome  $c_2$  (lane 3) and its cysteine-less derivative (lane 4) using the Strep-Tactin Sepharose resin. The data show that apoCcmE interacts specifically with CcmI and that the Flag-fused CcmI shows the same behavior towards apocytochrome  $c_2$  that its His-derivative, indicating that the different tags do not interfere with the observed protein-protein interactions.
